# Supplementary material for: Zinc(ii) coordination polymers with substituted benzenedicarboxylate and tripodal imidazole ligands: syntheses, structures and properties
Source: Royal Society of Chemistry journal article supplement (doi:10.1039/c4ce00835a), 2014-05-29
Supplement: c4ce00835a1.pdf [file c4ce00835a1.pdf]

*Electronic supplementary information (ESI)*

**Zinc(II) coordination polymers with substituted benzenedicarboxylate  
and tripodal imidazole ligands: syntheses, structures and properties**

**Ji-Ai Hua, Yue Zhao, Qing Liu, Dan Zhao, Kai Chen and Wei-Yin Sun\***

*Coordination Chemistry Institute, State Key Laboratory of Coordination Chemistry, School of  
Chemistry and Chemical Engineering, Nanjing National Laboratory of Microstructures,  
Nanjing University, Nanjing 210093, China. E-mail: [sunwy@nju.edu.cn](mailto:sunwy@nju.edu.cn); Fax: +86 25  
83314502*

**Table S1** Hydrogen bonding data for complexes **2-4**.

| Complex 2                |                             |                                |                                        |                                |
|--------------------------|-----------------------------|--------------------------------|----------------------------------------|--------------------------------|
| <i>D</i> -H ··· <i>A</i> | <i>d</i> ( <i>D</i> -H) (Å) | <i>d</i> (H ··· <i>A</i> ) (Å) | <i>d</i> ( <i>D</i> ··· <i>A</i> ) (Å) | ∠ <i>D</i> -H ··· <i>A</i> (°) |
| O7W-H7WB ···O2W#1        | 0.97                        | 2.02                           | 2.935(6)                               | 156                            |
| O1W-H1WA ···O1#2         | 0.82                        | 1.92                           | 2.700(5)                               | 160                            |
| O1W-H1WB ···O5#3         | 0.89                        | 1.72                           | 2.593(5)                               | 165                            |
| C1-H1 ···O6W#4           | 0.93                        | 2.40                           | 3.310(6)                               | 166                            |
| C9-H9 ···O6W#4           | 0.93                        | 2.34                           | 3.235(6)                               | 161                            |
| O2W-H2WA ···O4W#4        | 0.82                        | 2.05                           | 2.788(5)                               | 150                            |
| O2W-H2WB ···O3W#5        | 0.96                        | 1.90                           | 2.849(5)                               | 174                            |
| O6W-H6WB ···O5#6         | 0.97                        | 1.93                           | 2.867(6)                               | 163                            |
| O3W-H3WA ···O7W#7        | 0.90                        | 1.98                           | 2.808(6)                               | 151                            |
| O4W-H4WA ···O7W#8        | 0.95                        | 1.85                           | 2.752(6)                               | 158                            |
| O4W-H4WB ···O3#9         | 0.95                        | 1.87                           | 2.813(5)                               | 173                            |
| O5W-H5WA ···O8#10        | 0.89                        | 1.88                           | 2.759(6)                               | 171                            |
| C12-H12 ···O7#11         | 0.93                        | 2.34                           | 2.961(6)                               | 124                            |

Symmetry codes: #1 1-x, -y, 1-z; #2 2-x, 1-y, 1-z; #3 2-x, -y, 1-z; #4 x, -1+y, z; #5 1-x, -y, -z; #6 x, 1+y, z; #7 1-x, 1-y, 1-z; #8 x, y, -1+z; #9 1-x, 1-y, -z; #10 -1+x, 1+y, z; #11 -1+x, y, z.

### Complex 3

| <i>D</i> -H ··· <i>A</i> | <i>d</i> ( <i>D</i> -H) (Å) | <i>d</i> (H ··· <i>A</i> ) (Å) | <i>d</i> ( <i>D</i> ··· <i>A</i> ) (Å) | ∠ <i>D</i> -H ··· <i>A</i> (°) |
|--------------------------|-----------------------------|--------------------------------|----------------------------------------|--------------------------------|
| O(4)-H(4A) ···N(5)#1     | 1.05                        | 1.52                           | 2.573(4)                               | 178                            |
| C(3)-H(3) ···O(7)#2      | 0.93                        | 2.50                           | 3.351 (4)                              | 151                            |
| C(9)-H(9) ···O(7)#2      | 0.93                        | 2.53                           | 3.341 (4)                              | 146                            |
| C(12)-H(12) ···O(2)#2    | 0.93                        | 2.36                           | 3.261 (4)                              | 164                            |
| C(13)-H(13) ···O(3)#2    | 0.93                        | 2.58                           | 3.178(4)                               | 123                            |

Symmetry codes: #1 1+x, 1/2-y, -1/2+z; #2 x, 1/2-y, 1/2+z.

### Complex 4

| <i>D</i> -H ··· <i>A</i> | <i>d</i> ( <i>D</i> -H) (Å) | <i>d</i> (H ··· <i>A</i> ) (Å) | <i>d</i> ( <i>D</i> ··· <i>A</i> ) (Å) | ∠ <i>D</i> -H ··· <i>A</i> (°) |
|--------------------------|-----------------------------|--------------------------------|----------------------------------------|--------------------------------|
| C(12)-H(12) ···O(7)#1    | 0.93                        | 2.41                           | 3.312(4)                               | 163                            |
| C(3)-H(3) ···N(5)#2      | 0.93                        | 2.40                           | 3.306(3)                               | 166                            |
| C(5)-H(5) ···O(5)#3      | 0.93                        | 2.55                           | 3.481(3)                               | 178                            |
| C(9)-H(9) ···O(5)#4      | 0.93                        | 2.58                           | 3.492(4)                               | 168                            |
| C(1)-H(1) ···O(7)#5      | 0.93                        | 2.60                           | 3.524(4)                               | 173                            |

Symmetry codes: #1 1-x, 1-y, 1-z; #2 3/2-x, -1/2+y, 3/2-z; #3 2-x, 1-y, 1-z; #4 3/2-x, 1/2+y, 3/2-z; #5 1/2-x, 1/2+y, 3/2-z.

---

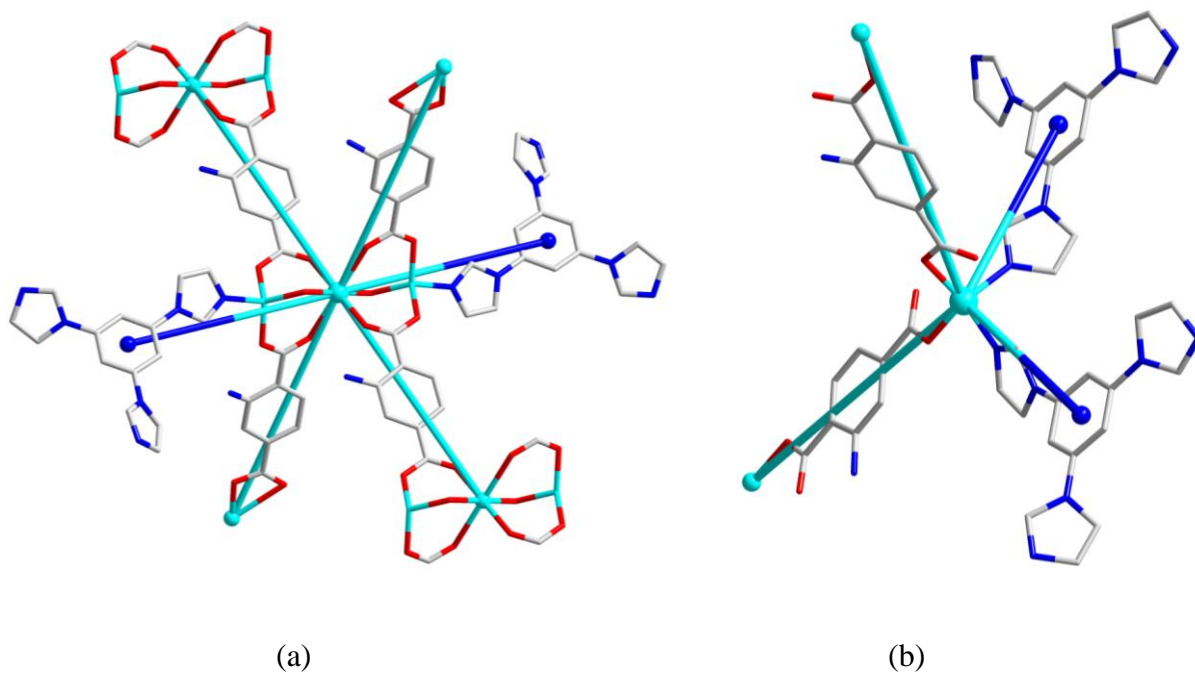

**Fig. S1** (a) The 6-connected node of  $\text{Zn}_3(\text{OCO})_4(\mu_2\text{-OH})_2$  in **1**. (b) The 4-connected node of  $\text{Zn1}$  building unit in **1**.

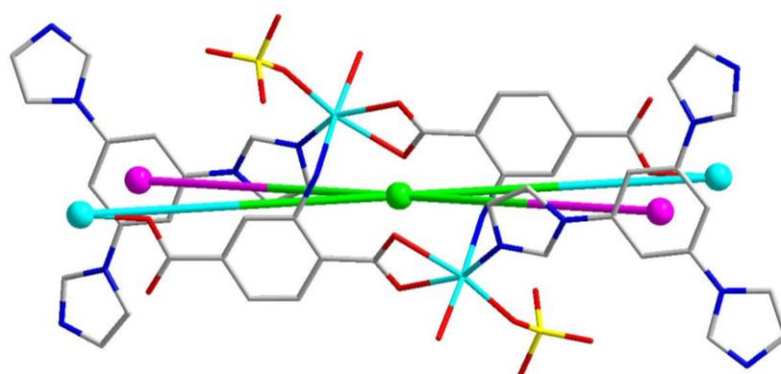

**Fig. S2** The 4-connected node of  $\text{Zn}_2(\text{BDC-NH}_2)_2$  building unit in **2**.

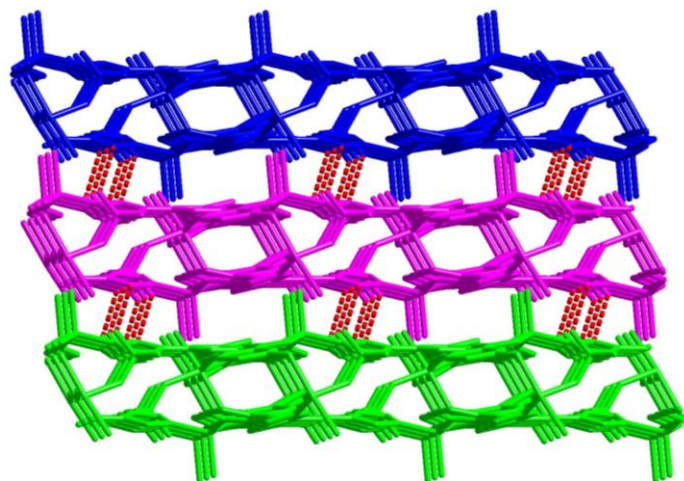

(a)

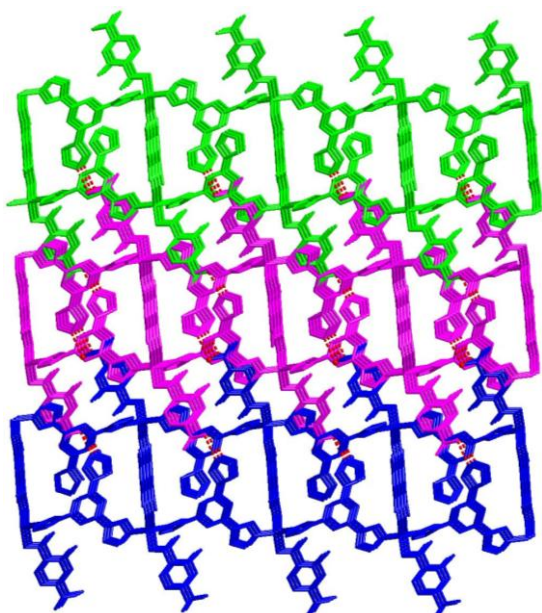

(b)

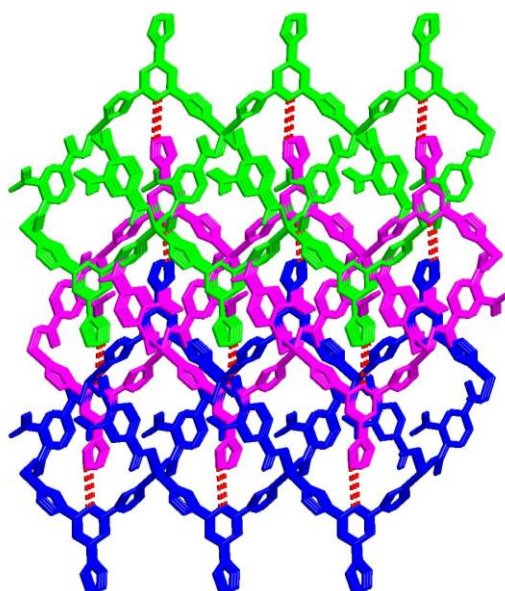

(c)

**Fig. S3** The 2D layers are further held by C12-H12  $\cdots$ O7, O4-H4A  $\cdots$ N5 and C3-H3  $\cdots$ N5 hydrogen bonds respectively to obtain 3D supramolecular structures of **2** (a), **3** (b) and **4** (c): different colors indicate the different layers. The hydrogen bonds are indicated by the red dashed lines.

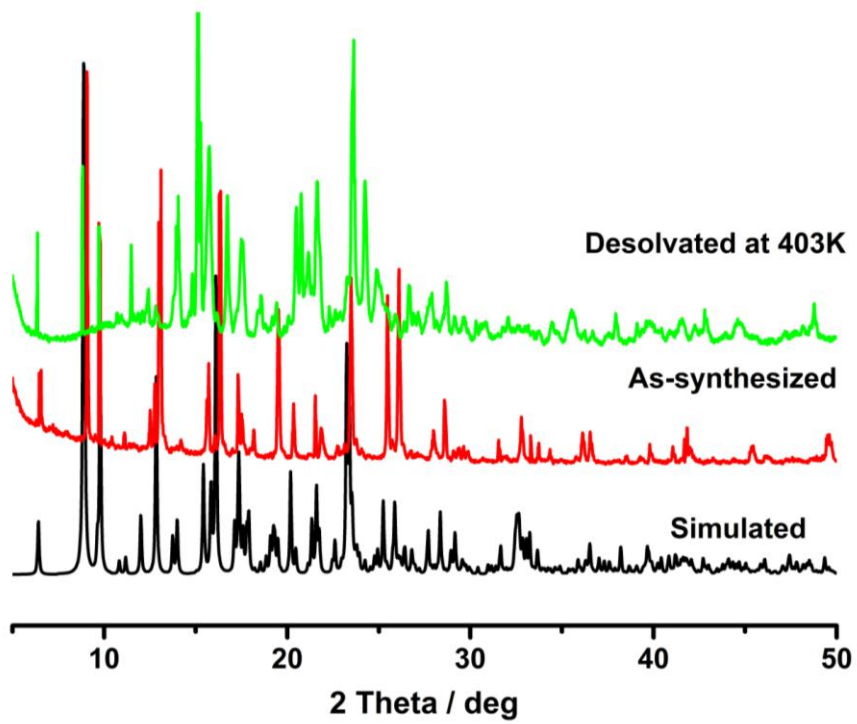

(a)

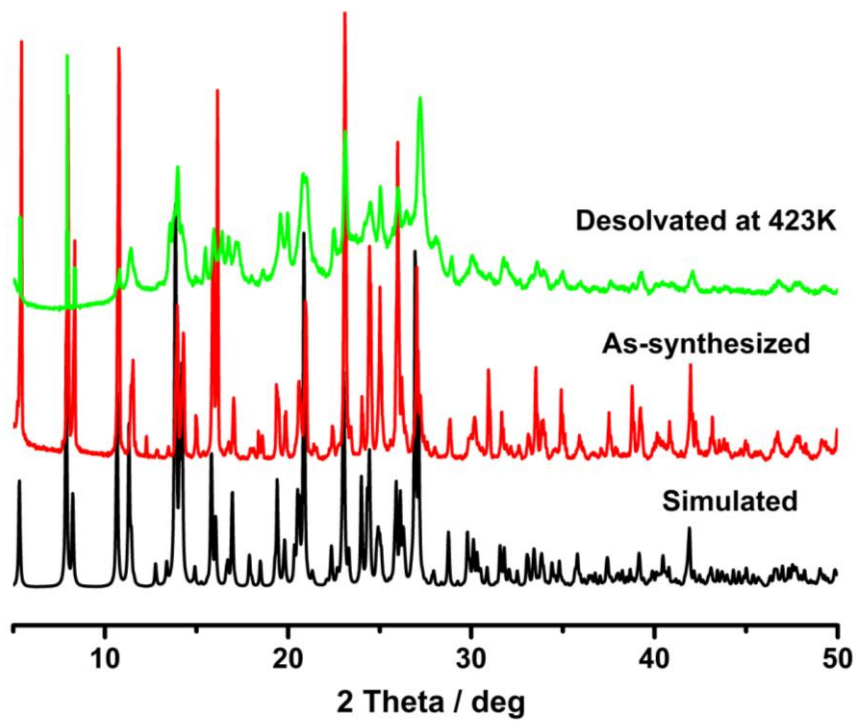

(b)

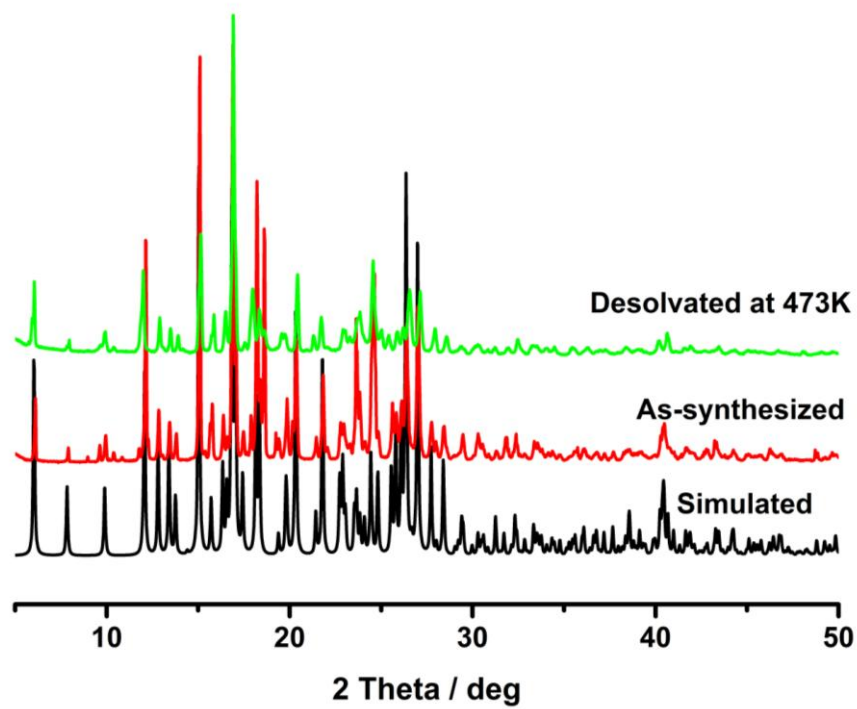

(c)

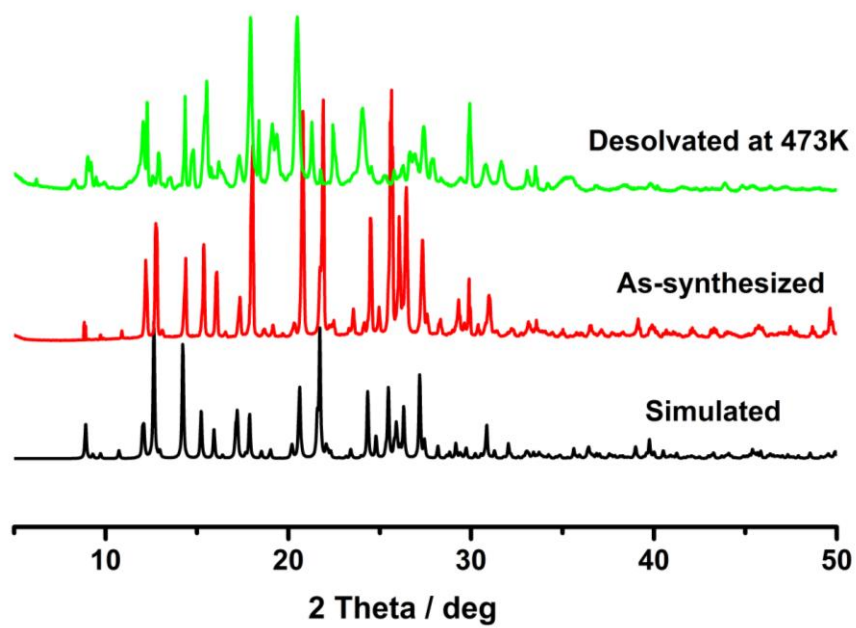

(d)

**Fig. S4** The PXR D patterns of **1** (a)-4 (d).

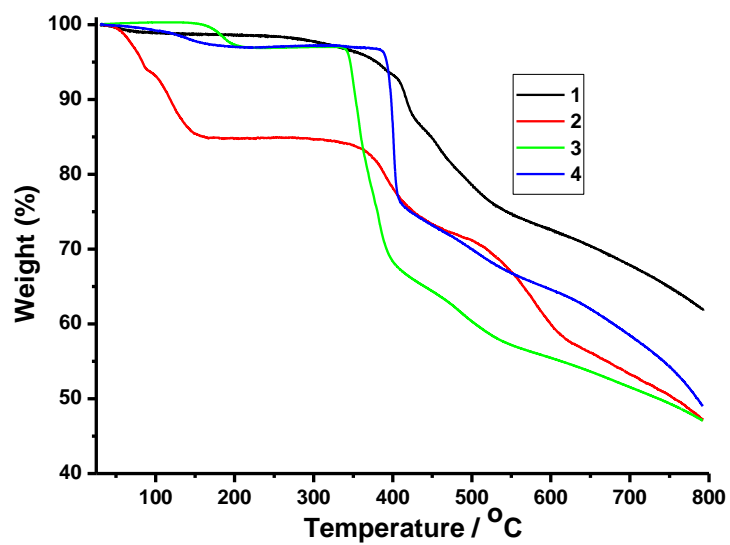

(a)

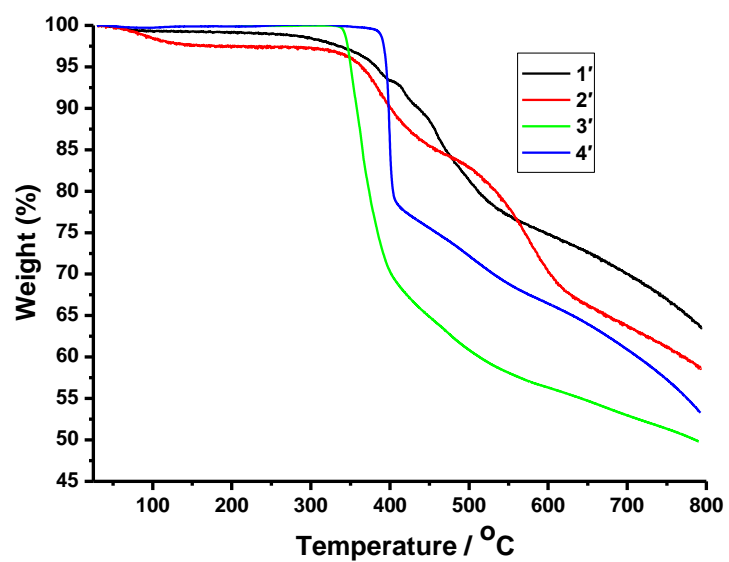

(b)

**Fig. S5** The TGA curves of complexes 1-4 (a) and desolvated samples 1'-4' (b).
